# Supplementary material for: The Prognostic Significance of Notch1 and Fatty Acid Binding Protein 7 (FABP7) Expression in Resected Tracheobronchial Adenoid Cystic Carcinoma: A Multicenter Retrospective Study
Source: PubMed Central journal article supplement — Cancer Res Treat. 2017 Nov 15;50(4):1064–73. doi: 10.4143/crt.2017.337 (PMC6192911; doi:10.4143/crt.2017.337), 2017-11-15
Supplement: crt-2017-337-suppl1.pdf [file crt-2017-337-suppl1.pdf]

**S1 Table.** Demographics and clinical characteristics of 368 patients with resected tracheobronchial adenoid cystic carcinoma

| Characteristic     | No. of patients (%)                    |
|--------------------|----------------------------------------|
| Age (yr)           | Median: 50.2                           |
| Sex                | Male: 203 (55.2)<br>Female: 165 (44.8) |
| Location           |                                        |
| Trachea            | 166 (45.2)                             |
| Main bronchus      | 85 (23.0)                              |
| Lobar bronchus     | 39 (10.6)                              |
| Segmental bronchus | 78 (21.2)                              |
| Symptoms           |                                        |
| Cough              | 81 (22.0)                              |
| Hemoptosis         | 58 (15.8)                              |
| Dyspnea            | 151 (41.0)                             |
| Stridor            | 29 (7.9)                               |
| Dysphagia          | 11 (3.0)                               |
| Hoarseness         | 16 (4.3)                               |
| Fever              | 10 (2.7)                               |
| Other              | 12 (3.3)                               |
