# Supplementary material for: The Prognostic Significance of Notch1 and Fatty Acid Binding Protein 7 (FABP7) Expression in Resected Tracheobronchial Adenoid Cystic Carcinoma: A Multicenter Retrospective Study
Source: PubMed Central journal article supplement — Cancer Res Treat. 2017 Nov 15;50(4):1064–73. doi: 10.4143/crt.2017.337 (PMC6192911; doi:10.4143/crt.2017.337), 2017-11-15
Supplement: crt-2017-337-suppl2.pdf [file crt-2017-337-suppl2.pdf]

**S2 Table.** Pathological features of 368 patients with resected tracheobronchial adenoid cystic carcinoma

| Characteristic         |            | No. of patients (%) |
|------------------------|------------|---------------------|
| Histologic grade       | Tubular    | 111 (30.2)          |
|                        | Cribriform | 183 (49.7)          |
|                        | Solid      | 74 (20.1)           |
| Margin status          | Negative   | 142 (38.6)          |
|                        | Positive   | 226 (61.4)          |
| Lymph node involvement | Negative   | 174 (47.3)          |
|                        | Positive   | 81 (22.0)           |
| Tumor size (cm)        | No biopsy  | 113 (30.7)          |
|                        | < 3        | 261 (70.9)          |
|                        | ≥ 3        | 107 (29.1)          |
