# Supplementary material for: The Prognostic Significance of Notch1 and Fatty Acid Binding Protein 7 (FABP7) Expression in Resected Tracheobronchial Adenoid Cystic Carcinoma: A Multicenter Retrospective Study
Source: PubMed Central journal article supplement — Cancer Res Treat. 2017 Nov 15;50(4):1064–73. doi: 10.4143/crt.2017.337 (PMC6192911; doi:10.4143/crt.2017.337), 2017-11-15
Supplement: crt-2017-337-suppl3.pdf [file crt-2017-337-suppl3.pdf]

**S3 Table.** Resection types in 368 patients with resected tracheobronchial adenoid cystic carcinoma

| Resection type                     | No. (%)    |
|------------------------------------|------------|
| Laryngotracheal resection          | 11 (3.0)   |
| Tracheal resection                 | 144 (39.1) |
| Carina without pulmonary resection | 27 (7.3)   |
| Carina with pulmonary resection    | 15 (4.1)   |
| Pneumonectomy                      | 16 (4.3)   |
| Lobectomy                          | 50 (13.6)  |
| Sleeve pneumonectomy               | 19 (5.2)   |
| Sleeve lobectomy                   | 86 (23.4)  |
