# Supplementary material for: The Prognostic Significance of Notch1 and Fatty Acid Binding Protein 7 (FABP7) Expression in Resected Tracheobronchial Adenoid Cystic Carcinoma: A Multicenter Retrospective Study
Source: PubMed Central journal article supplement — Cancer Res Treat. 2017 Nov 15;50(4):1064–73. doi: 10.4143/crt.2017.337 (PMC6192911; doi:10.4143/crt.2017.337), 2017-11-15
Supplement: crt-2017-337-suppl4.pdf [file crt-2017-337-suppl4.pdf]

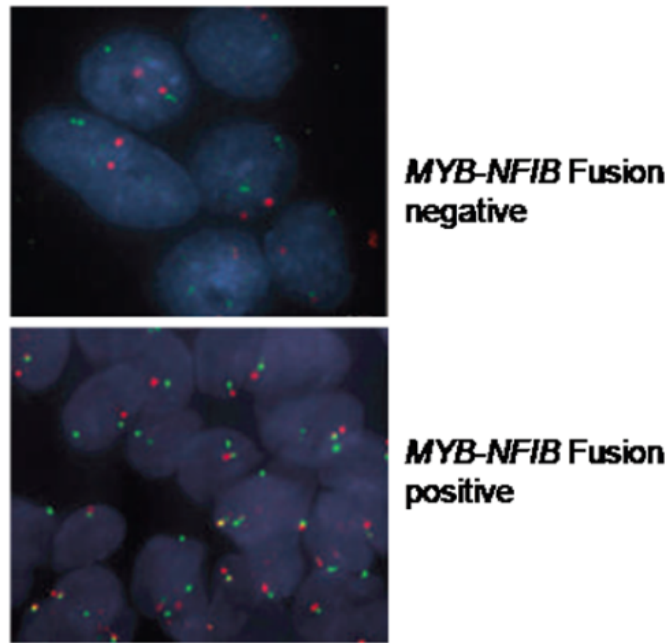

**S4 Fig.** Fluorescent in situ hybridization of adenoid cystic carcinoma of the trachea was performed that assayed *MYB-NFIB* locus fusion.
