# Supplementary material for: The Prognostic Significance of Notch1 and Fatty Acid Binding Protein 7 (FABP7) Expression in Resected Tracheobronchial Adenoid Cystic Carcinoma: A Multicenter Retrospective Study
Source: PubMed Central journal article supplement — Cancer Res Treat. 2017 Nov 15;50(4):1064–73. doi: 10.4143/crt.2017.337 (PMC6192911; doi:10.4143/crt.2017.337), 2017-11-15
Supplement: crt-2017-337-suppl6.pdf [file crt-2017-337-suppl6.pdf]

## **Supplementary Methods**

### **Fluorescent in-situ hybridization (FISH)**

BAC clones containing the *MYB* gene (RP11-104D9) and the *NFIB* gene (RP11-54D21 and RP11-79B9) were labeled with spectrum green and spectrum red, respectively (Abbott Laboratories). Hybridization and detection were done according to the manufacturer's protocols. To determine the gene fusion status, 200 individual nuclei were analyzed for each case. The interphase nuclei were captured and processed using the Quantitative Image Processing System (Applied Imaging).
